# Supplementary material for: Epidemiological investigation of foot-and-mouth disease outbreaks in a Vietnamese bear rescue centre
Source: Front Vet Sci. 2024 Jun 17;11:1389029. doi: 10.3389/fvets.2024.1389029 (PMC11215046; doi:10.3389/fvets.2024.1389029)
Supplement: Supplementary file 1 [file Table_1.DOCX]

Table S1. Bear characteristics, location and samples collected.

| **Bear ID** | **Species** | **Sex** | **Age**  **(in years)** | **Clinical signs** | **Samples collected** | **Samples collected –**  **Months in relation to onset of clinical signs (for cases) and beginning of the outbreak (for no-cases)** | **House** |
| --- | --- | --- | --- | --- | --- | --- | --- |
| B044 | ABB | Female | 10 | Yes | Yes | -7a,b, 17a,d, 49a,d | Mountain |
| B045 | ABB | Male | 15 | No | Yes | -13a,b, -6a,b, 22a,b, 42a,b, 52a,b | Mountain |
| B052 | ABB | Female | 10 | No | Yes | -2a,b, 6a,d, 14a,d, 31c,d | Mountain |
| B055 | ABB | Female | 7 | Yes | Yes | -3a,b, 17a,d, 44a,d | Mountain |
| B059 | ABB | Male | 4 | Yes | Yes | -4a,b, 3c,b, 38 c,b | Mountain |
| B061 | ABB | Male | 10 | No | Yes | -5a,b, 1c,d, 5a,d, 13a,d, 22a,d, 40a,d | Mountain |
| B034 | ABB | Female | 10 | No | No | - | Mountain |
| B041 | ABB | Male | 7 | No | No | - | Mountain |
| B043 | ABB | Male | 10 | No | No | - | Mountain |
| B049 | ABB | Female | 8 | No | No | - | Mountain |
| B050 | ABB | Male | 10 | No | No | - | Mountain |
| B066 | ABB | Female | 9 | No | No | - | Mountain |
| B067 | ABB | Male | 9 | No | No | - | Mountain |
| B068 | ABB | Female | 10 | No | No | - | Mountain |
| B070 | ABB | Male | 8 | No | No | - | Mountain |
| B071 | ABB | Male | 9 | No | No | - | Mountain |
| B028 | ABB | Female | 10 | No | Yes | -24a,b, -21a,b, 9c,d, 41c,d | River |
| B029 | ABB | Female | 10 | No | Yes | -24 a,b, -21a,b, 10a,d, 48a,d | River |
| B038 (B5)* | ABB | Female | 7 | Yes | Yes | -3a,b, 1c,d, 2c,d, 7a,d, 22a,d, 44a,d | River |
| B042 (B4)* | ABB | Female | 8 | Yes | Yes | -14a,b, 0a,b, 1c,d, 15c,d | River |
| B053 | ABB | Female | 5 | Yes | Yes | -6a,b, 8a,d, 10a,d, 28a,d, 34a,d | River |
| B054 | ABB | Female | 7 | Yes | Yes | -10a,b, 35a,d | River |
| B056 | ABB | Female | 1 | Yes | Yes | 18a,d | River |
| B057 | ABB | Male | 1 | Yes | Yes | 11a,d, 42a,d | River |
| B063 (B3)* | MSB | Female | 1 | Yes | Yes | -9a,b, 6a,d | River |
| B069 | ABB | Male | 8 | Yes | Yes | -4a,b, 7a,d, 55a,d | River |
| B072 | ABB | Male | 1 | Yes | Yes | 11c,d, 46c,d | River |
| B073 | ABB | Male | 1 | Yes | Yes | 11a,d, 47a,d | River |
| B075 (B2)* | ABB | Female | 1 | Yes | Yes | 0a,b, 1c,d, 12c,d, 54a,d | River |
| B076 | ABB | Female | 0 | Yes | Yes | 21c,d | River |
| B077 | ABB | Male | 0 | Yes | Yes | 19a,d | River |
| B079 (B1)* | ABB | Female | 4 | Yes | Yes | -3a,b, 0a,b, 1a,d, 7a,d, 12a,d, 40a,d, 45a,d | River |
| B082 | ABB | Male | 1 | No | Yes | 1a,d, 11a,d, 45a,d | River |
| B081 | ABB | Male | 7 | No | No | - | River |

*Tested in Officer et al (2011), in brackets the IDs from previous study.

ABB= Asiatic black bear, MSB= Malayan sun bear

a Negative to NSP

b Negative to VNT

c Positive to NSP

d Positive to VNT
